# Supplementary material
Source: PubMed Central journal article supplement (PMC8319061)
Supplement: NIHMS1699594-supplement-1.pdf [file NIHMS1699594-supplement-1.pdf]

# Supporting Information

## Differentiated Activities of Decorin and Biglycan in the Progression of Post-Traumatic Osteoarthritis

*Biao Han,<sup>1,a</sup> Qing Li,<sup>1,a</sup> Chao Wang,<sup>1</sup> Prashant Chandrasekaran,<sup>1</sup> Ying Zhou,<sup>2</sup> Ling Qin,<sup>3</sup>  
X. Sherry Liu,<sup>3</sup> Motomi Enomoto-Iwamoto,<sup>4</sup> Dehan Kong,<sup>2</sup> Renato V. Iozzo,<sup>5</sup> David E. Birk,<sup>6</sup> Lin Han<sup>1,\*</sup>*

<sup>1</sup>School of Biomedical Engineering, Science and Health Systems, Drexel University,  
Philadelphia, PA 19104, United States

<sup>2</sup>Department of Statistical Sciences, University of Toronto, Toronto, ON M5S 3G3, Canada

<sup>3</sup>McKay Orthopaedic Research Laboratory, Department of Orthopaedic Surgery, Perelman School of  
Medicine, University of Pennsylvania, Philadelphia, PA 19104, United States

<sup>4</sup>Department of Orthopaedics, School of Medicine, University of Maryland,  
Baltimore, MD 21201, United States

<sup>5</sup>Department of Pathology, Anatomy, and Cell Biology, Sidney Kimmel Medical College,  
Thomas Jefferson University, Philadelphia, PA 19107, United States

<sup>6</sup>Department of Molecular Pharmacology and Physiology, Morsani School of Medicine,  
University of South Florida, Tampa, FL 33612, United States

<sup>a</sup>: B. Han and Q. Li contributed equally to this work.

\*Correspondence and requests for materials should be addressed to:

Dr. Lin Han

Phone: (215)571-3821

Fax: (215)895-4983

Email: [lh535@drexel.edu](mailto:lh535@drexel.edu).

**Table S1.** Summary of structural and biomechanical analysis outcomes of control, *Dcn<sup>iKO</sup>*, *Bgn<sup>iKO</sup>* and *Dcn/Bgn<sup>iKO</sup>* mice at 8 weeks post-surgery, shown as mean [95% CI] from values averaged by each animal, as well as statistical outcomes between surgeries for each genotype. The *p*-values were calculated for comparisons between Sham and DMM surgeries for each genotype using the linear mixed effect model, except for the *p*-values of von Mises concentration  $\kappa$ , which were calculated using the Mardia and Jupp test of concentration equality, followed by Holm-Bonferroni correction for multiple contrasts amongst the four genotypes.

|                                      |                 | Control          | <i>Dcn<sup>iKO</sup></i> | <i>Bgn<sup>iKO</sup></i> | <i>Dcn/Bgn<sup>iKO</sup></i> |
|--------------------------------------|-----------------|------------------|--------------------------|--------------------------|------------------------------|
| Mankin Score                         | Sham            | 0.63 [0.24 1.03] | 1.00 [0.20 1.79]         | 0.78 [0.09 1.47]         | 2.17 [1.62 2.71]             |
|                                      | DMM             | 5.78 [5.35 6.21] | 7.17 [6.89 7.44]         | 6.22 [5.68 6.76]         | 7.29 [6.87 7.71]             |
|                                      | <i>n</i>        | 10               | 6                        | 6                        | 6                            |
|                                      | <i>p</i> -value | < 0.001          | < 0.001                  | < 0.001                  | < 0.001                      |
| <i>t</i> <sub>uncalcified</sub> (μm) | Sham            | 38 [35 41]       | 42 [37 46]               | 38 [33 43]               | 31 [28 33]                   |
|                                      | DMM             | 24 [22 26]       | 24 [22 27]               | 25 [19 31]               | 16 [14 19]                   |
|                                      | <i>n</i>        | 10               | 6                        | 6                        | 6                            |
|                                      | <i>p</i> -value | < 0.001          | < 0.001                  | < 0.001                  | < 0.001                      |
| <i>t</i> <sub>total</sub> (μm)       | Sham            | 122 [116 128]    | 124 [117 132]            | 111 [106 116]            | 102 [97 106]                 |
|                                      | DMM             | 105 [97 113]     | 87 [76 97]               | 100 [95 104]             | 81 [73 89]                   |
|                                      | <i>n</i>        | 10               | 6                        | 6                        | 6                            |
|                                      | <i>p</i> -value | < 0.001          | < 0.001                  | 0.004                    | < 0.001                      |
| von Mises Concentration, $\kappa$    | Sham            | 0.36 [0.27 0.46] | 0.24 [0.17 0.32]         | 0.32 [0.21 0.44]         | 0.36 [0.24 0.50]             |
|                                      | DMM             | 0.32 [0.23 0.41] | 2.17 [1.96 2.38]         | 0.34 [0.22 0.46]         | 2.17 [1.85 2.50]             |
|                                      | <i>n</i>        | 4                | 4                        | 4                        | 4                            |
|                                      | <i>p</i> -value | 0.497            | < 0.001                  | 0.125                    | < 0.001                      |
| <i>E</i> <sub>ind</sub> (MPa)        | Sham            | 1.42 [1.17 1.67] | 1.18 [0.94 1.42]         | 1.20 [0.85 1.54]         | 0.81 [0.28 1.33]             |
|                                      | DMM             | 0.43 [0.31 0.54] | 0.65 [0.44 0.85]         | 0.69 [0.27 1.11]         | 2.37 [1.48 3.27]             |
|                                      | <i>n</i>        | 9                | 5                        | 5                        | 5                            |
|                                      | <i>p</i> -value | < 0.001          | 0.009                    | 0.006                    | < 0.001                      |
| %Ca (wt.)                            | DMM             | 0.27 [0.17 0.37] | 0.47 [0.30 0.63]         | 0.26 [0.19 0.34]         | 1.08 [0.59 1.56]             |
|                                      | <i>n</i>        | 6                | 6                        | 5                        | 6                            |

**Table S2.** Summary of the fibril diameter outcomes,  $d_{col}$ , on the condyle cartilage surfaces of control,  $Dcn^{iKO}$ ,  $Bgn^{iKO}$  and  $Dcn/Bgn^{iKO}$  mice at 8 weeks post-surgery, as well as statistical outcomes between surgeries for each genotype. The  $p$ -values were calculated for comparisons between Sham and DMM surgeries for each genotype using the linear mixed effect model, followed by Holm-Bonferroni correction for multiple contrasts amongst the four genotypes. For comparisons between genotypes, no significant differences in  $d_{col}$  were detected ( $p = 0.314$  amongst the four Sham groups, and  $p = 0.431$  amongst the four DMM groups).

| Fibril diameter<br>$d_{col}$ (nm) | Control |      | $Dcn^{iKO}$ |      | $Bgn^{iKO}$ |      | $Dcn/Bgn^{iKO}$ |      |
|-----------------------------------|---------|------|-------------|------|-------------|------|-----------------|------|
|                                   | Sham    | DMM  | Sham        | DMM  | Sham        | DMM  | Sham            | DMM  |
| mean                              | 33.5    | 33.2 | 33.8        | 34.3 | 34.1        | 33.1 | 33.4            | 33.3 |
| std                               | 7.4     | 7.6  | 6.8         | 8.6  | 9.2         | 6.8  | 5.7             | 6.4  |
| $Q_1$                             | 27.3    | 26.7 | 28.2        | 26.5 | 26.3        | 27.2 | 29.3            | 27.6 |
| $Q_2$                             | 33.3    | 33.1 | 33.8        | 33.1 | 34.4        | 33.3 | 33.6            | 33.3 |
| $Q_3$                             | 39.2    | 40.0 | 40.0        | 42.2 | 41.9        | 39.1 | 38.2            | 39.1 |
| min                               | 20.2    | 20.2 | 22.3        | 20.2 | 17.0        | 21.3 | 22.8            | 21.9 |
| max                               | 47.4    | 46.2 | 45.4        | 49.8 | 49.7        | 45.2 | 43.0            | 44.0 |
| $n_{fibril}$                      | 300     | 300  | 300         | 300  | 300         | 300  | 300             | 300  |
| $p$ -value                        | 1.000   |      | 0.973       |      | 0.967       |      | 0.394           |      |

**Table S3.** Summary of statistical analysis outcomes of structural and biomechanical parameters for pair-wise comparisons between genotypes for each surgery group at 8 weeks post-surgery. The  $p$ -values were calculated using the linear mixed effect model followed by Tukey-Kramer multiple comparison correction, except for the  $p$ -values of von Mises concentration  $\kappa$ , which were calculated using the Mardia and Jupp test of concentration equality followed by Holm-Bonferroni correction.

| Mankin Score                         |         |                           |                           |                               |         |                           |                           |
|--------------------------------------|---------|---------------------------|---------------------------|-------------------------------|---------|---------------------------|---------------------------|
| Sham                                 |         |                           |                           | DMM                           |         |                           |                           |
|                                      | Control | <i>Dcn</i> <sup>ikO</sup> | <i>Bgn</i> <sup>ikO</sup> |                               | Control | <i>Dcn</i> <sup>ikO</sup> | <i>Bgn</i> <sup>ikO</sup> |
| <i>Dcn</i> <sup>ikO</sup>            | 0.581   |                           |                           | <i>Dcn</i> <sup>ikO</sup>     | < 0.001 |                           |                           |
| <i>Bgn</i> <sup>ikO</sup>            | 0.958   | 0.899                     |                           | <i>Bgn</i> <sup>ikO</sup>     | 0.428   | 0.025                     |                           |
| <i>Dcn/Bgn</i> <sup>ikO</sup>        | < 0.001 | 0.004                     | < 0.001                   | <i>Dcn/Bgn</i> <sup>ikO</sup> | < 0.001 | 0.980                     | 0.009                     |
| <i>t</i> <sub>uncalcified</sub> (μm) |         |                           |                           |                               |         |                           |                           |
| Sham                                 |         |                           |                           | DMM                           |         |                           |                           |
|                                      | Control | <i>Dcn</i> <sup>ikO</sup> | <i>Bgn</i> <sup>ikO</sup> |                               | Control | <i>Dcn</i> <sup>ikO</sup> | <i>Bgn</i> <sup>ikO</sup> |
| <i>Dcn</i> <sup>ikO</sup>            | 0.183   |                           |                           | <i>Dcn</i> <sup>ikO</sup>     | 0.984   |                           |                           |
| <i>Bgn</i> <sup>ikO</sup>            | 0.995   | 0.378                     |                           | <i>Bgn</i> <sup>ikO</sup>     | 0.919   | 0.994                     |                           |
| <i>Dcn/Bgn</i> <sup>ikO</sup>        | 0.005   | < 0.001                   | 0.008                     | <i>Dcn/Bgn</i> <sup>ikO</sup> | 0.003   | 0.003                     | 0.002                     |
| <i>t</i> <sub>total</sub> (μm)       |         |                           |                           |                               |         |                           |                           |
| Sham                                 |         |                           |                           | DMM                           |         |                           |                           |
|                                      | Control | <i>Dcn</i> <sup>ikO</sup> | <i>Bgn</i> <sup>ikO</sup> |                               | Control | <i>Dcn</i> <sup>ikO</sup> | <i>Bgn</i> <sup>ikO</sup> |
| <i>Dcn</i> <sup>ikO</sup>            | 0.963   |                           |                           | <i>Dcn</i> <sup>ikO</sup>     | < 0.001 |                           |                           |
| <i>Bgn</i> <sup>ikO</sup>            | 0.050   | 0.035                     |                           | <i>Bgn</i> <sup>ikO</sup>     | 0.612   | 0.048                     |                           |
| <i>Dcn/Bgn</i> <sup>ikO</sup>        | < 0.001 | < 0.001                   | 0.220                     | <i>Dcn/Bgn</i> <sup>ikO</sup> | < 0.001 | 0.642                     | 0.002                     |
| von Mises Concentration, $\kappa$    |         |                           |                           |                               |         |                           |                           |
| Sham                                 |         |                           |                           | DMM                           |         |                           |                           |
|                                      | Control | <i>Dcn</i> <sup>ikO</sup> | <i>Bgn</i> <sup>ikO</sup> |                               | Control | <i>Dcn</i> <sup>ikO</sup> | <i>Bgn</i> <sup>ikO</sup> |
| <i>Dcn</i> <sup>ikO</sup>            | 1.000   |                           |                           | <i>Dcn</i> <sup>ikO</sup>     | < 0.001 |                           |                           |
| <i>Bgn</i> <sup>ikO</sup>            | 0.447   | 0.342                     |                           | <i>Bgn</i> <sup>ikO</sup>     | 0.683   | < 0.001                   |                           |
| <i>Dcn/Bgn</i> <sup>ikO</sup>        | 0.902   | 1.000                     | 0.433                     | <i>Dcn/Bgn</i> <sup>ikO</sup> | < 0.001 | 0.950                     | < 0.001                   |
| <i>E</i> <sub>ind</sub> (MPa)        |         |                           |                           |                               |         |                           |                           |
| Sham                                 |         |                           |                           | DMM                           |         |                           |                           |
|                                      | Control | <i>Dcn</i> <sup>ikO</sup> | <i>Bgn</i> <sup>ikO</sup> |                               | Control | <i>Dcn</i> <sup>ikO</sup> | <i>Bgn</i> <sup>ikO</sup> |
| <i>Dcn</i> <sup>ikO</sup>            | 0.614   |                           |                           | <i>Dcn</i> <sup>ikO</sup>     | 0.682   |                           |                           |
| <i>Bgn</i> <sup>ikO</sup>            | 0.670   | 1.000                     |                           | <i>Bgn</i> <sup>ikO</sup>     | 0.547   | 0.997                     |                           |
| <i>Dcn/Bgn</i> <sup>ikO</sup>        | 0.017   | 0.341                     | 0.301                     | <i>Dcn/Bgn</i> <sup>ikO</sup> | < 0.001 | < 0.001                   | < 0.001                   |
| %Ca (wt.)                            |         |                           |                           |                               |         |                           |                           |
| DMM                                  |         |                           |                           |                               |         |                           |                           |
|                                      | Control | <i>Dcn</i> <sup>ikO</sup> | <i>Bgn</i> <sup>ikO</sup> |                               | Control | <i>Dcn</i> <sup>ikO</sup> | <i>Bgn</i> <sup>ikO</sup> |
| <i>Dcn</i> <sup>ikO</sup>            | 0.558   |                           |                           |                               |         |                           |                           |
| <i>Bgn</i> <sup>ikO</sup>            | 1.000   | 0.570                     |                           |                               |         |                           |                           |
| <i>Dcn/Bgn</i> <sup>ikO</sup>        | < 0.001 | 0.003                     | < 0.001                   |                               |         |                           |                           |

**Table S4.** Summary of micro-computed tomography ( $\mu$ CT) analysis outcomes of control, *Dcn<sup>iKO</sup>*, *Bgn<sup>iKO</sup>* and *Dcn/Bgn<sup>iKO</sup>* mice at 8 weeks post-surgery, shown as mean [95% CI] from values averaged by each animal, as well as statistical outcomes between surgeries for each genotype. The *p*-values were calculated for comparisons between Sham and DMM surgeries for each genotype using the linear mixed effect model, followed by Holm-Bonferroni correction for multiple contrasts amongst the four genotypes.

|                                                           |                 | Control       | <i>Dcn<sup>iKO</sup></i> | <i>Bgn<sup>iKO</sup></i> | <i>Dcn/Bgn<sup>iKO</sup></i> |
|-----------------------------------------------------------|-----------------|---------------|--------------------------|--------------------------|------------------------------|
| SBP. Th ( $\mu$ m)                                        | Sham            | 136 [108 163] | 134 [125 144]            | 111 [102 119]            | 121 [107 134]                |
|                                                           | DMM             | 130 [108 151] | 150 [133 168]            | 130 [113 147]            | 129 [120 137]                |
|                                                           | <i>n</i>        | 5             | 5                        | 5                        | 5                            |
|                                                           | <i>p</i> -value | 0.337         | 0.063                    | 0.027                    | 0.448                        |
| STB BV/TV (%)                                             | Sham            | 56 [45 66]    | 53 [42 65]               | 37 [35 40]               | 38 [31 44]                   |
|                                                           | DMM             | 57 [51 63]    | 64 [55 74]               | 39 [35 43]               | 42 [32 51]                   |
|                                                           | <i>n</i>        | 5             | 5                        | 5                        | 5                            |
|                                                           | <i>p</i> -value | 0.467         | 0.001                    | 0.765                    | 0.317                        |
| STB Tb.N ( $\text{mm}^{-1}$ )                             | Sham            | 7.0 [6.2 7.8] | 7.6 [6.5 8.8]            | 6.1 [6.0 6.2]            | 5.7 [5.1 6.2]                |
|                                                           | DMM             | 7.7 [7.2 8.3] | 8.7 [7.8 9.7]            | 6.2 [5.7 6.7]            | 5.8 [5.1 6.5]                |
|                                                           | <i>n</i>        | 5             | 5                        | 5                        | 5                            |
|                                                           | <i>p</i> -value | 0.002         | < 0.001                  | 0.551                    | 0.745                        |
| STB Tb.Th ( $\mu$ m)                                      | Sham            | 89 [68 110]   | 82 [73 91]               | 62 [56 68]               | 73 [62 85]                   |
|                                                           | DMM             | 95 [78 112]   | 102 [96 108]             | 73 [59 87]               | 85 [69 102]                  |
|                                                           | <i>n</i>        | 5             | 5                        | 5                        | 5                            |
|                                                           | <i>p</i> -value | 0.053         | < 0.001                  | 0.002                    | 0.001                        |
| Men. OV <sub>ant.</sub> ( $\times 10^{-3} \text{mm}^3$ )  | Sham            | 93 [91 96]    | 86 [69 102]              | 80 [60 100]              | 80 [60 100]                  |
|                                                           | DMM             | 216 [141 291] | 165 [126 203]            | 151 [110 192]            | 154 [126 183]                |
|                                                           | <i>n</i>        | 5             | 5                        | 5                        | 5                            |
|                                                           | <i>p</i> -value | < 0.001       | < 0.001                  | 0.001                    | < 0.001                      |
| Men. OV <sub>post.</sub> ( $\times 10^{-3} \text{mm}^3$ ) | Sham            | 30 [13 47]    | 39 [21 56]               | 16 [11 20]               | 60 [44 76]                   |
|                                                           | DMM             | 54 [17 92]    | 103 [45 162]             | 75 [33 117]              | 107 [80 134]                 |
|                                                           | <i>n</i>        | 5             | 5                        | 5                        | 5                            |
|                                                           | <i>p</i> -value | 0.167         | 0.002                    | 0.005                    | 0.020                        |

**Table S5.** Summary of statistical analysis outcomes of micro-computed tomography ( $\mu$ CT) parameters for pair-wise comparisons between genotypes for each surgery group at 8 weeks post-surgery. The  $p$ -values were calculated using the linear mixed effect model followed by Tukey-Kramer multiple comparison correction.

| SBP. Th ( $\mu$ m)                                            |         |                           |                           |                               |         |                           |                           |
|---------------------------------------------------------------|---------|---------------------------|---------------------------|-------------------------------|---------|---------------------------|---------------------------|
| Sham                                                          |         |                           |                           | DMM                           |         |                           |                           |
|                                                               | Control | <i>Dcn</i> <sup>iKO</sup> | <i>Bgn</i> <sup>iKO</sup> |                               | Control | <i>Dcn</i> <sup>iKO</sup> | <i>Bgn</i> <sup>iKO</sup> |
| <i>Dcn</i> <sup>iKO</sup>                                     | 1.000   |                           |                           | <i>Dcn</i> <sup>iKO</sup>     | 0.093   |                           |                           |
| <i>Bgn</i> <sup>iKO</sup>                                     | 0.032   | 0.046                     |                           | <i>Bgn</i> <sup>iKO</sup>     | 1.000   | 0.108                     |                           |
| <i>Dcn/Bgn</i> <sup>iKO</sup>                                 | 0.300   | 0.381                     | 0.663                     | <i>Dcn/Bgn</i> <sup>iKO</sup> | 1.000   | 0.071                     | 1.000                     |
| STB BV/TV (%)                                                 |         |                           |                           |                               |         |                           |                           |
| Sham                                                          |         |                           |                           | DMM                           |         |                           |                           |
|                                                               | Control | <i>Dcn</i> <sup>iKO</sup> | <i>Bgn</i> <sup>iKO</sup> |                               | Control | <i>Dcn</i> <sup>iKO</sup> | <i>Bgn</i> <sup>iKO</sup> |
| <i>Dcn</i> <sup>iKO</sup>                                     | 0.957   |                           |                           | <i>Dcn</i> <sup>iKO</sup>     | 0.321   |                           |                           |
| <i>Bgn</i> <sup>iKO</sup>                                     | 0.001   | 0.003                     |                           | <i>Bgn</i> <sup>iKO</sup>     | 0.001   | < 0.001                   |                           |
| <i>Dcn/Bgn</i> <sup>iKO</sup>                                 | 0.001   | 0.004                     | 1.000                     | <i>Dcn/Bgn</i> <sup>iKO</sup> | 0.005   | < 0.001                   | 0.940                     |
| STB Tb.N                                                      |         |                           |                           |                               |         |                           |                           |
| Sham                                                          |         |                           |                           | DMM                           |         |                           |                           |
|                                                               | Control | <i>Dcn</i> <sup>iKO</sup> | <i>Bgn</i> <sup>iKO</sup> |                               | Control | <i>Dcn</i> <sup>iKO</sup> | <i>Bgn</i> <sup>iKO</sup> |
| <i>Dcn</i> <sup>iKO</sup>                                     | 0.322   |                           |                           | <i>Dcn</i> <sup>iKO</sup>     | 0.052   |                           |                           |
| <i>Bgn</i> <sup>iKO</sup>                                     | 0.105   | 0.002                     |                           | <i>Bgn</i> <sup>iKO</sup>     | 0.003   | < 0.001                   |                           |
| <i>Dcn/Bgn</i> <sup>iKO</sup>                                 | 0.008   | < 0.001                   | 0.632                     | <i>Dcn/Bgn</i> <sup>iKO</sup> | < 0.001 | < 0.001                   | 0.719                     |
| STB Tb.Th ( $\mu$ m)                                          |         |                           |                           |                               |         |                           |                           |
| Sham                                                          |         |                           |                           | DMM                           |         |                           |                           |
|                                                               | Control | <i>Dcn</i> <sup>iKO</sup> | <i>Bgn</i> <sup>iKO</sup> |                               | Control | <i>Dcn</i> <sup>iKO</sup> | <i>Bgn</i> <sup>iKO</sup> |
| <i>Dcn</i> <sup>iKO</sup>                                     | 0.767   |                           |                           | <i>Dcn</i> <sup>iKO</sup>     | 0.719   |                           |                           |
| <i>Bgn</i> <sup>iKO</sup>                                     | 0.005   | 0.042                     |                           | <i>Bgn</i> <sup>iKO</sup>     | 0.026   | 0.003                     |                           |
| <i>Dcn/Bgn</i> <sup>iKO</sup>                                 | 0.135   | 0.560                     | 0.412                     | <i>Dcn/Bgn</i> <sup>iKO</sup> | 0.538   | 0.108                     | 0.313                     |
| Men. OV <sub>ant.</sub> ( $\times 10^{-3}$ mm <sup>3</sup> )  |         |                           |                           |                               |         |                           |                           |
| Sham                                                          |         |                           |                           | DMM                           |         |                           |                           |
|                                                               | Control | <i>Dcn</i> <sup>iKO</sup> | <i>Bgn</i> <sup>iKO</sup> |                               | Control | <i>Dcn</i> <sup>iKO</sup> | <i>Bgn</i> <sup>iKO</sup> |
| <i>Dcn</i> <sup>iKO</sup>                                     | 0.970   |                           |                           | <i>Dcn</i> <sup>iKO</sup>     | 0.024   |                           |                           |
| <i>Bgn</i> <sup>iKO</sup>                                     | 0.873   | 0.990                     |                           | <i>Bgn</i> <sup>iKO</sup>     | 0.003   | 0.863                     |                           |
| <i>Dcn/Bgn</i> <sup>iKO</sup>                                 | 0.877   | 0.990                     | 1.000                     | <i>Dcn/Bgn</i> <sup>iKO</sup> | 0.005   | 0.936                     | 0.997                     |
| Men. OV <sub>post.</sub> ( $\times 10^{-3}$ mm <sup>3</sup> ) |         |                           |                           |                               |         |                           |                           |
| Sham                                                          |         |                           |                           | DMM                           |         |                           |                           |
|                                                               | Control | <i>Dcn</i> <sup>iKO</sup> | <i>Bgn</i> <sup>iKO</sup> |                               | Control | <i>Dcn</i> <sup>iKO</sup> | <i>Bgn</i> <sup>iKO</sup> |
| <i>Dcn</i> <sup>iKO</sup>                                     | 0.960   |                           |                           | <i>Dcn</i> <sup>iKO</sup>     | 0.034   |                           |                           |
| <i>Bgn</i> <sup>iKO</sup>                                     | 0.844   | 0.557                     |                           | <i>Bgn</i> <sup>iKO</sup>     | 0.651   | 0.370                     |                           |
| <i>Dcn/Bgn</i> <sup>iKO</sup>                                 | 0.338   | 0.632                     | 0.068                     | <i>Dcn/Bgn</i> <sup>iKO</sup> | 0.021   | 0.998                     | 0.273                     |
